# Supplementary material for: Strengthening Community Networks for Vital Event Reporting: Community-Based Reporting of Vital Events in Rural Mali
Source: PubMed Central journal article supplement (PMC4659620; doi:10.1371/journal.pone.0132164), 2015-11-25

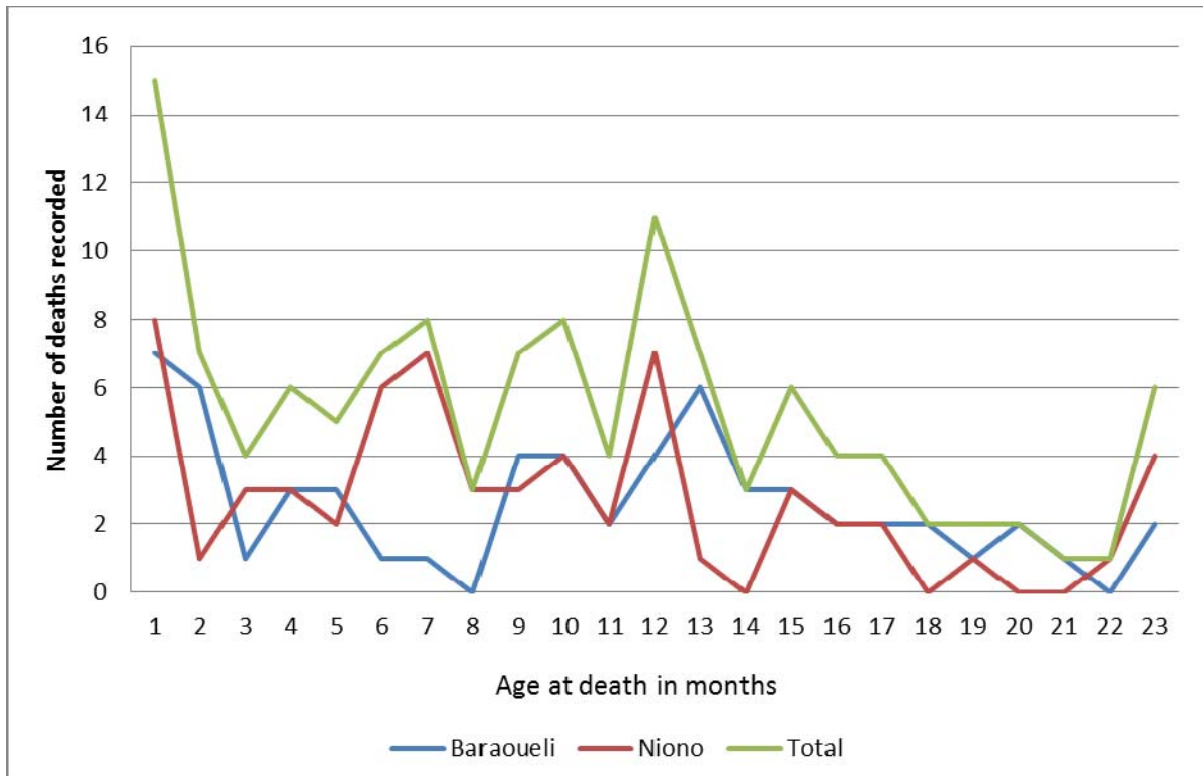

Supplement: pone.0132164.s002.pdf [file pone.0132164.s002.pdf]
