# Supplementary material for: Strengthening Community Networks for Vital Event Reporting: Community-Based Reporting of Vital Events in Rural Mali
Source: PubMed Central journal article supplement (PMC4659620; doi:10.1371/journal.pone.0132164), 2015-11-25
Supplement: pone.0132164.s008.pdf [file pone.0132164.s008.pdf]

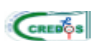

FORMULAIRE DE COLLECTE DE GROSSESSE

District : \_\_\_\_\_ Aire de santé : \_\_\_\_\_ Village : \_\_\_\_\_ Relais : \_\_\_\_\_

Collecte du mois de : \_\_\_\_\_ Nombre Total de Grossesses :

| N° | Date Enrg<br>jj/mm/aa | GROSSESSES |      |                       |     |                    |                             |                     |                       |        |  |                           | Commentaires |
|----|-----------------------|------------|------|-----------------------|-----|--------------------|-----------------------------|---------------------|-----------------------|--------|--|---------------------------|--------------|
|    |                       | N° C       | N° M | Nom Femme<br>enceinte | Age | Nom du<br>Conjoint | Age<br>Grossesse<br>En mois | Date PA<br>jj/mm/aa | Issue de la Grossesse |        |  | Date<br>Issue<br>jj/mm/aa |              |
|    |                       |            |      |                       |     |                    |                             | Né vivant           | Mort-né               | Avorté |  |                           |              |
| 1  | __/__/__              |            |      |                       |     |                    |                             | __/__/__            |                       |        |  | __/__/__                  |              |
| 2  | __/__/__              |            |      |                       |     |                    |                             | __/__/__            |                       |        |  | __/__/__                  |              |
| 3  | __/__/__              |            |      |                       |     |                    |                             | __/__/__            |                       |        |  | __/__/__                  |              |
| 4  | __/__/__              |            |      |                       |     |                    |                             | __/__/__            |                       |        |  | __/__/__                  |              |
| 5  | __/__/__              |            |      |                       |     |                    |                             | __/__/__            |                       |        |  | __/__/__                  |              |
| 6  | __/__/__              |            |      |                       |     |                    |                             | __/__/__            |                       |        |  | __/__/__                  |              |
| 7  | __/__/__              |            |      |                       |     |                    |                             | __/__/__            |                       |        |  | __/__/__                  |              |
| 8  | __/__/__              |            |      |                       |     |                    |                             | __/__/__            |                       |        |  | __/__/__                  |              |
| 9  | __/__/__              |            |      |                       |     |                    |                             | __/__/__            |                       |        |  | __/__/__                  |              |
| 10 | __/__/__              |            |      |                       |     |                    |                             | __/__/__            |                       |        |  | __/__/__                  |              |

Date Enrg = Date enregistrement des données ; Date PA= Date Probable d'Accouchement; N°C : Numéro concession ; N° M : Numéro Ménage

Première saisie : Par \_\_\_\_\_ : Date : \_\_/\_\_/\_\_

Deuxième saisie : Par \_\_\_\_\_ : Date : \_\_/\_\_/\_\_

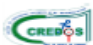

### FORMULAIRE DE COLLECTE DE NAISSANCE

District : \_\_\_\_\_ Aire de santé : \_\_\_\_\_ Village : \_\_\_\_\_ Relais : \_\_\_\_\_  
Collecte du mois de : \_\_\_\_\_ Nombre Total de Naissances :

| N° | Date Enrg.<br>jj/mm/aa | NAISSANCES |       |             |                |                 |                        |                   |                 |       |      |   |           |     |  | Commentaires |
|----|------------------------|------------|-------|-------------|----------------|-----------------|------------------------|-------------------|-----------------|-------|------|---|-----------|-----|--|--------------|
|    |                        | No C.      | No M. | Nom du Père | Nom de la Mère | Nom de l'enfant | Date Nais.<br>jj/mm/aa | Lieu de Naissance |                 |       | Sexe |   | Né Vivant |     |  |              |
|    |                        |            |       |             |                |                 |                        | Domicile          | Centre de santé | Autre | M    | F | OUI       | NON |  |              |
| 1  | __/__/__               |            |       |             |                |                 | __/__/__               |                   |                 |       |      |   |           |     |  |              |
| 2  | __/__/__               |            |       |             |                |                 | __/__/__               |                   |                 |       |      |   |           |     |  |              |
| 3  | __/__/__               |            |       |             |                |                 | __/__/__               |                   |                 |       |      |   |           |     |  |              |
| 4  | __/__/__               |            |       |             |                |                 | __/__/__               |                   |                 |       |      |   |           |     |  |              |
| 5  | __/__/__               |            |       |             |                |                 | __/__/__               |                   |                 |       |      |   |           |     |  |              |
| 6  | __/__/__               |            |       |             |                |                 | __/__/__               |                   |                 |       |      |   |           |     |  |              |
| 7  | __/__/__               |            |       |             |                |                 | __/__/__               |                   |                 |       |      |   |           |     |  |              |
| 8  | __/__/__               |            |       |             |                |                 | __/__/__               |                   |                 |       |      |   |           |     |  |              |
| 9  | __/__/__               |            |       |             |                |                 | __/__/__               |                   |                 |       |      |   |           |     |  |              |
| 10 | __/__/__               |            |       |             |                |                 | __/__/__               |                   |                 |       |      |   |           |     |  |              |

Date Enrg = Date enregistrement des données ; Date Nais = Date de Naissance ; M= Masculin ; F= Féminin ; N°C : Numéro concession ; N° M : Numéro Ménage

Première saisie : Par \_\_\_\_\_ : Date : \_\_/\_\_/\_\_

Deuxième saisie : Par \_\_\_\_\_ : Date : \_\_/\_\_/\_\_

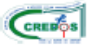

### FORMULAIRE DE COLLECTE DE DECES

District : \_\_\_\_\_ Aire de santé : \_\_\_\_\_ Village : \_\_\_\_\_ Relais : \_\_\_\_\_  
Collecte du mois de : \_\_\_\_\_ Nombre Total de Décès :

| N° | Date Enrg.<br>jj/mm/aa | N°<br>C | N°<br>M | DECES       |          |               |                               |                           |                              |      |      |   |                |               | Commentaires |                       |       |  |  |
|----|------------------------|---------|---------|-------------|----------|---------------|-------------------------------|---------------------------|------------------------------|------|------|---|----------------|---------------|--------------|-----------------------|-------|--|--|
|    |                        |         |         | Nom du Père | Nom Mère | Nom<br>Enfant | Date<br>Naissance<br>jj/mm/aa | Date<br>Décès<br>jj/mm/aa | Age au<br>moment<br>du Décès |      | Sexe |   | SP le<br>décès | Lieu de décès |              |                       |       |  |  |
|    |                        |         |         |             |          |               |                               |                           | Jour                         | Mois | M    | F |                | Domicile      |              | Centre<br>de<br>santé | Autre |  |  |
| 1  | __/__/__               |         |         |             |          |               | __/__/__                      | __/__/__                  |                              |      |      |   |                |               |              |                       |       |  |  |
| 2  | __/__/__               |         |         |             |          |               | __/__/__                      | __/__/__                  |                              |      |      |   |                |               |              |                       |       |  |  |
| 3  | __/__/__               |         |         |             |          |               | __/__/__                      | __/__/__                  |                              |      |      |   |                |               |              |                       |       |  |  |
| 4  | __/__/__               |         |         |             |          |               | __/__/__                      | __/__/__                  |                              |      |      |   |                |               |              |                       |       |  |  |
| 5  | __/__/__               |         |         |             |          |               | __/__/__                      | __/__/__                  |                              |      |      |   |                |               |              |                       |       |  |  |
| 6  | __/__/__               |         |         |             |          |               | __/__/__                      | __/__/__                  |                              |      |      |   |                |               |              |                       |       |  |  |
| 7  | __/__/__               |         |         |             |          |               | __/__/__                      | __/__/__                  |                              |      |      |   |                |               |              |                       |       |  |  |
| 8  | __/__/__               |         |         |             |          |               | __/__/__                      | __/__/__                  |                              |      |      |   |                |               |              |                       |       |  |  |
| 9  | __/__/__               |         |         |             |          |               | __/__/__                      | __/__/__                  |                              |      |      |   |                |               |              |                       |       |  |  |
| 10 | __/__/__               |         |         |             |          |               | __/__/__                      | __/__/__                  |                              |      |      |   |                |               |              |                       |       |  |  |

**Date Enrg** = Date enregistrement des données ; **SP le décès** = Signes précédents le décès; **M**= Masculin ; **F**= Féminin ; **N°C** : Numéro concession ; **N° M** : Numéro Ménage

Première Saisie Par : \_\_\_\_\_ Date : \_\_/\_\_/\_\_

Deuxième Saisie Par : \_\_\_\_\_ Date : \_\_/\_\_/\_\_
