# Supplementary material for: Strengthening Community Networks for Vital Event Reporting: Community-Based Reporting of Vital Events in Rural Mali
Source: PLoS One. 2015 Nov 25;10(11):e0132164. doi: 10.1371/journal.pone.0132164 (PMC4659620; doi:10.1371/journal.pone.0132164)
Supplement: S2 Text — (PDF) [file pone.0132164.s009.pdf]

| INFORMATION MENAGE                                                                                                                                                                                                                                                                                                                                                                                                                                     |  | HH                                                                                                                                                                                                                                            |
|--------------------------------------------------------------------------------------------------------------------------------------------------------------------------------------------------------------------------------------------------------------------------------------------------------------------------------------------------------------------------------------------------------------------------------------------------------|--|-----------------------------------------------------------------------------------------------------------------------------------------------------------------------------------------------------------------------------------------------|
| HH1. DISTRICT<br>BARAOUELI ..... 1<br><br>NIONO ..... 2                                                                                                                                                                                                                                                                                                                                                                                                |  | HH2. AIRES DE SANTE<br>MOLODO ..... 1<br>NARA IBT ..... 2<br>KALAKE ..... 3<br>SANANDO ..... 4                                                                                                                                                |
| HH3. Nom et Numéro du Village:<br>Non ..... Numéro .....                                                                                                                                                                                                                                                                                                                                                                                               |  | HH4. Nom et Numéro du Relais<br>Nom: ..... Numéro .....                                                                                                                                                                                       |
| HH4. Numéro de concession: R ____ C ____                                                                                                                                                                                                                                                                                                                                                                                                               |  | HH5. Numéro de ménage (de la base recensement)<br>____                                                                                                                                                                                        |
| HH6. Nom et Numéro l'enquêteur (trice):<br>Non ..... Numéro .....                                                                                                                                                                                                                                                                                                                                                                                      |  | HH7. Nom et Numéro du contrôleur<br>Nom: ..... Numéro .....                                                                                                                                                                                   |
| HH8. Jour/ Mois ..... / ..... /2013                                                                                                                                                                                                                                                                                                                                                                                                                    |  |                                                                                                                                                                                                                                               |
| Lire le formulaire de consentement Ménage au répondant du questionnaire Ménage avant de poursuivre l'interview.<br>La permission est-elle accordée?<br><input type="checkbox"/> Oui, la permission est accordée ➔ Allez à HL2 (page suivante) pour enregistrer le temps et ensuite démarrer l'interview.<br><input type="checkbox"/> Non, la permission n'est pas accordée ➔ Complétez HH11. Discutez de ce résultat d'interview avec votre contrôleur |  |                                                                                                                                                                                                                                               |
| Une fois que tout le questionnaire Ménage sera rempli, vous devriez compléter les parties ci-dessous:                                                                                                                                                                                                                                                                                                                                                  |  |                                                                                                                                                                                                                                               |
| HH9. Nom du chef de Ménage: .....                                                                                                                                                                                                                                                                                                                                                                                                                      |  |                                                                                                                                                                                                                                               |
| HH11. Résultat de l'enquête Ménage<br>Rempli ..... 01<br>Pas de membre dans le ménage ou pas de membre éligible au moment de la visite .... 02<br>Tous les membres du ménage sont absents pour une longue durée ..... 03<br>Refusé ..... 04<br>Ménage vacant / pas de ménage à l'adresse ..... 05<br>Ménage détruit ..... 06<br>Ménage non-trouvé ..... 07<br>Autre (précisez): ..... 96                                                               |  | HH12. Répondant du Questionnaire Ménage<br>Nom: .....<br>Numéro de ligne: .....<br>HH13. Nombre total de membres de Ménage: .....<br>HH14. Nombre de femmes âgées de 15-49 Ans: .....<br>HH15. Nombre de Questionnaires Femmes remplis: ..... |
| Notes de l'enquêteur (trice)                                                                                                                                                                                                                                                                                                                                                                                                                           |  |                                                                                                                                                                                                                                               |
| HH16. Contrôleur (Nom et Numéro): .....                                                                                                                                                                                                                                                                                                                                                                                                                |  |                                                                                                                                                                                                                                               |
| HH17. Enregistrez l'heure.                                                                                                                                                                                                                                                                                                                                                                                                                             |  | Heures et minutes: ____ : ____                                                                                                                                                                                                                |

FICHE DE DENOMBREMENT DES MENAGES (LISTE DES MEMBRES DU MENAGE)

HL

S'il vous plait, donnez-moi le prénom puis le nom des personnes qui vivent habituellement dans votre ménage ainsi que les visiteurs qui ont passé la nuit dernière chez vous. Commencez par le chef de ménage sur la Ligne 01. *Listez tous les membres du ménage (HL2), leurs liens de parenté avec le chef de ménage (HL3) et leur sexe (HL4)*

*Demandez ensuite: Y a-t-il d'autres membres qui vivent dans le ménage, même s'ils ne sont pas à la maison présentement? (Ceci pourrait inclure les personnes à l'école, au travail ou au champ).Si oui, compléter la liste de questions HL2-HL4 Ensuite, poser le reste des questions, en commençant parHL5 pour une personne à la fois.*

|                     |                      |                                                                |                                                    |   |                                                           |                                                                                                                                |    |    |                                                                           |                                                                            |                                                                            |                                         |                                                      |                                                   |                                                                      |        |
|---------------------|----------------------|----------------------------------------------------------------|----------------------------------------------------|---|-----------------------------------------------------------|--------------------------------------------------------------------------------------------------------------------------------|----|----|---------------------------------------------------------------------------|----------------------------------------------------------------------------|----------------------------------------------------------------------------|-----------------------------------------|------------------------------------------------------|---------------------------------------------------|----------------------------------------------------------------------|--------|
|                     |                      |                                                                |                                                    |   |                                                           |                                                                                                                                |    |    |                                                                           | Pour les membres du ménage âgées de 15 ans et plus                         | Femme âgée de 15-49 ans                                                    |                                         |                                                      |                                                   | Pour tous les membres du ménage                                      |        |
| HL1<br>NO.<br>Ligne | HL2<br>PRENOM ET NOM | HL3.QUEL LIEN DE PARENTE ENTRE (PRENOM) ET LE CHEF DE MENAGE ? | HL4. DE QUEL SEXE (MASCULIN OU FEMININ) EST (NOM)? |   | HL5A. (PRENOM) RESIDE-T-IL HABITUELLEMENT DANS CE MENAGE? | HL5. QUELLE EST LA DATE DE NAISSANCE DE (PRENOM)?                                                                              |    |    | HL6. QUEL ÂGE A (PRENOM)?                                                 | HL7. QUELLE EST ACTUELLEMENT LA SITUATION MATRIMONIALE DE (PRENOM) ?       | HL8. Entourez le numéro de ligne s'il s'agit d'une femme âgée de 15-49 ans | HL9. Numéro de Ménage (M) de la femme   | HL9A. Numéro de Ménage (M) de la mère de la femme    | HL10. Numéro d'identifiant de la femme            | HL11. DEPUIS COMBIEN D'ANNEES (PRENOM) VIT-IL/ELLE DANS CE VILLAGE ? |        |
|                     |                      |                                                                | 1 Masculin<br>2 Féminin                            |   | 1 Oui<br>2 Non                                            | 98 NSP 98 NSP 9998 NSP<br>S'assurer que toutes les personnes de moins de 6 ans ont le mois et l'année de naissance renseignés. |    |    | Enregistrez en années révolues<br><br>Si 95 ans ou plus, enregistrez '95' | 1 Marié ou en couple<br>2 Divorcé / Séparé<br>3 Veuf (ve)<br>4 Célibataire |                                                                            | Si 99, allez à HL10; sinon allez à HL9A | Si la femme ne dépend pas de sa mère, enregistrez 00 | Si la femme n'a pas de carte, enregistrez 9999999 | Enregistrez 0 si moins d'une année                                   |        |
| Ligne               | Prénom et Nom        | Lien de parenté                                                | M                                                  | F | O                                                         | N                                                                                                                              | jj | mm | Année                                                                     | Age                                                                        | Situation matrimoniale                                                     | 15-49                                   |                                                      |                                                   |                                                                      | Années |
| 01                  |                      | 01                                                             | 1                                                  | 2 | 1                                                         | 2                                                                                                                              |    |    |                                                                           |                                                                            | 1 2 3 4                                                                    | 1                                       |                                                      |                                                   |                                                                      |        |
| 02                  |                      |                                                                | 1                                                  | 2 | 1                                                         | 2                                                                                                                              |    |    |                                                                           |                                                                            | 1 2 3 4                                                                    | 2                                       |                                                      |                                                   |                                                                      |        |
| 03                  |                      |                                                                | 1                                                  | 2 | 1                                                         | 2                                                                                                                              |    |    |                                                                           |                                                                            | 1 2 3 4                                                                    | 3                                       |                                                      |                                                   |                                                                      |        |
| 04                  |                      |                                                                | 1                                                  | 2 | 1                                                         | 2                                                                                                                              |    |    |                                                                           |                                                                            | 1 2 3 4                                                                    | 4                                       |                                                      |                                                   |                                                                      |        |
| 05                  |                      |                                                                | 1                                                  | 2 | 1                                                         | 2                                                                                                                              |    |    |                                                                           |                                                                            | 1 2 3 4                                                                    | 5                                       |                                                      |                                                   |                                                                      |        |
| 06                  |                      |                                                                | 1                                                  | 2 | 1                                                         | 2                                                                                                                              |    |    |                                                                           |                                                                            | 1 2 3 4                                                                    | 6                                       |                                                      |                                                   |                                                                      |        |
| 07                  |                      |                                                                | 1                                                  | 2 | 1                                                         | 2                                                                                                                              |    |    |                                                                           |                                                                            | 1 2 3 4                                                                    | 7                                       |                                                      |                                                   |                                                                      |        |
| 08                  |                      |                                                                | 1                                                  | 2 | 1                                                         | 2                                                                                                                              |    |    |                                                                           |                                                                            | 1 2 3 4                                                                    | 8                                       |                                                      |                                                   |                                                                      |        |

|    |  |  |     |     |  |  |  |  |         |    |  |  |  |  |
|----|--|--|-----|-----|--|--|--|--|---------|----|--|--|--|--|
| 09 |  |  | 1 2 | 1 2 |  |  |  |  | 1 2 3 4 | 9  |  |  |  |  |
| 10 |  |  | 1 2 | 1 2 |  |  |  |  | 1 2 3 4 | 10 |  |  |  |  |

|  |  |  |  |  |  |  |  |  |                                                    |                         |  |  |                                 |
|--|--|--|--|--|--|--|--|--|----------------------------------------------------|-------------------------|--|--|---------------------------------|
|  |  |  |  |  |  |  |  |  | Pour les membres du ménage âgées de 15 ans et plus | Femme âgée de 15-49 ans |  |  | Pour tous les membres du ménage |
|--|--|--|--|--|--|--|--|--|----------------------------------------------------|-------------------------|--|--|---------------------------------|

| HL1<br>NO.<br>Ligne | HL2<br>PRENOM ET NOM | HL3. QUEL<br>LIEN DE<br>PARENTE<br>ENTRE<br>(PRENOM)<br>ET LE CHEF<br>DE<br>MENAGE ? | HL4. DE<br>QUEL SEXE<br>(MASCULIN<br>OU<br>FEMININ)<br>EST<br>(NOM)? | HL5A.<br>(PRENOM)<br>RESIDE-T-IL<br>HABITUELLEMENT<br>DANS CE | HL5. QUELLE EST LA DATE DE<br>NAISSANCE DE (PRENOM)? |        |          | QUEL ÂGE<br>A<br>(PRENOM)?                                                               | HL7. QUELLE EST<br>ACTUELLEMENT<br>LA SITUATION<br>MATRIMONIALE<br>DE (PRENOM) ?  | HL8.<br>Entourez<br>le numéro<br>de ligne<br>s'il s'agit<br>d'une<br>femme<br>âgée<br>de 15-49<br>ans | HL9. Numéro<br>de Ménage<br>(M) de la<br>femme | HL9A. Numéro<br>de Ménage (M)<br>de la mère de<br>la femme    | HL10. Numéro<br>d'identifiant de la femme | HL9.<br>DEPUIS<br>COMBIEN<br>D'ANNEES<br>(PRENOM)<br>VIT-IL/ELLE<br>DANS CE |
|---------------------|----------------------|--------------------------------------------------------------------------------------|----------------------------------------------------------------------|---------------------------------------------------------------|------------------------------------------------------|--------|----------|------------------------------------------------------------------------------------------|-----------------------------------------------------------------------------------|-------------------------------------------------------------------------------------------------------|------------------------------------------------|---------------------------------------------------------------|-------------------------------------------|-----------------------------------------------------------------------------|
|                     |                      |                                                                                      | 1 Masculin<br>2 Féminin                                              | 1 Oui<br>2 Non                                                | 98 NSP                                               | 98 NSP | 9998 NSP | Enregistrez<br>en années<br>révolues<br><br>Si 95 ans ou<br>plus,<br>enregistrez<br>'95' | 1 Marié ou en couple<br>2 Divorcé / Séparé<br>3 Veuf (ve)<br>4 Jamais marié ou en |                                                                                                       |                                                | Si la femme ne<br>dépend pas de<br>sa mère,<br>enregistrez 00 |                                           | Enregistrez 0<br>si moins<br>d'une année                                    |
| Ligne               | Prénom et Nom        | Lien de parenté                                                                      | M F                                                                  | O N                                                           | jj                                                   | mm     | Année    | Age                                                                                      | Situation matrimoniale                                                            | 15-49                                                                                                 |                                                |                                                               |                                           | Années                                                                      |

|    |  |  |     |     |  |  |  |  |         |    |  |  |  |  |
|----|--|--|-----|-----|--|--|--|--|---------|----|--|--|--|--|
| 11 |  |  | 1 2 | 1 2 |  |  |  |  | 1 2 3 4 | 11 |  |  |  |  |
| 12 |  |  | 1 2 | 1 2 |  |  |  |  | 1 2 3 4 | 12 |  |  |  |  |
| 13 |  |  | 1 2 | 1 2 |  |  |  |  | 1 2 3 4 | 13 |  |  |  |  |
| 14 |  |  | 1 2 | 1 2 |  |  |  |  | 1 2 3 4 | 14 |  |  |  |  |
| 15 |  |  | 1 2 | 1 2 |  |  |  |  | 1 2 3 4 | 15 |  |  |  |  |
| 16 |  |  | 1 2 | 1 2 |  |  |  |  | 1 2 3 4 | 16 |  |  |  |  |

Cochez si un questionnaire additionnel a été rempli ☐

Demandez s'il y d'autres membres de la famille qui ont été omis. Spécialement les enfants ou nourrissons qui ne sont pas sur la liste ci-dessus, et d'autres personnes qui ne sont pas membres de la famille tels les servantes ou amis mais qui vivent habituellement dans ce ménage.

Maintenant pour toutes les femmes âgées de 15-49 ans, Ecrire leur nom et numéro de ligne et autres identifiants sur la fiche information du questionnaire femme. Vous devriez maintenant avoir un questionnaire femme pour chaque femme éligible du ménage (âgée de 15-49 ans)

\* Codes de HL3: Lien de parenté avec le chef de ménage: .

|                          |                           |                             |
|--------------------------|---------------------------|-----------------------------|
| 01 Chef de ménage        | 09 Beau-frère/ Belle-sœur | 13 Adoption/enfants confiés |
| 02 Epoux (se)            | 10 Oncle/Tante            | 14 Pas de lien              |
| 03 Fils/ Fille           | 11 Neveu/ Nièce           | 98 Ne sait pas              |
| 04 beau-fils/belle-fille | 12 Autre relation         |                             |

| INFORMATION FEMMES                                                                                                                                                                     |  | WM                                             |  |
|----------------------------------------------------------------------------------------------------------------------------------------------------------------------------------------|--|------------------------------------------------|--|
| Ce questionnaire doit être administré à toutes les femmes âgées de 15 à 49 ans (voir Fiche de dénombrement des ménages, colonne HL8. Il faudra utiliser un pour chaque femme éligible. |  |                                                |  |
| WM1A. DISTRICT                                                                                                                                                                         |  | WM1B. AIRES DE SANTE                           |  |
| BARAOUELI ..... 1                                                                                                                                                                      |  | MOLODO ..... 1                                 |  |
| NIONO ..... 2                                                                                                                                                                          |  | NARA IBT ..... 2                               |  |
|                                                                                                                                                                                        |  | KALAKE ..... 3                                 |  |
|                                                                                                                                                                                        |  | SANANDO ..... 4                                |  |
| WM1C. Nom et Numéro du Village:                                                                                                                                                        |  | WM1D. Nom et Numéro du Relais                  |  |
| Nom: ..... Numéro .....                                                                                                                                                                |  | Nom: ..... Numéro .....                        |  |
| WM2. Numéro de concession: R ____ C ____                                                                                                                                               |  | WM3. Numéro de ménage (de la base recensement) |  |
|                                                                                                                                                                                        |  | _____                                          |  |
| WM4. Nom de la femme                                                                                                                                                                   |  | WM5. Numéro de ligne de la femme (HL1): _____  |  |
| Nom: .....                                                                                                                                                                             |  |                                                |  |
| WM6. Nom et Numéro l'enquêteur (trice):                                                                                                                                                |  | WM7. Jour/ Mois                                |  |
| Nom: ..... Numéro .....                                                                                                                                                                |  | _____/_____/2013                               |  |
| Lire le formulaire de consentement Femme au répondant du questionnaire Femme avant de poursuivre l'interview.                                                                          |  |                                                |  |
| La permission est-elle accordée?                                                                                                                                                       |  |                                                |  |
| <input type="checkbox"/> Oui, la permission est accordée ➔ Allez à WM10 pour enregistrer l'heure et ensuite démarrer l'interview.                                                      |  |                                                |  |
| <input type="checkbox"/> Non, la permission n'est pas accordée ➔ Complétez WM8. Discutez de ce résultat d'interview avec votre contrôleur                                              |  |                                                |  |
| WM8. Résultat de l'enquête Femme                                                                                                                                                       |  |                                                |  |
|                                                                                                                                                                                        |  | Rempli: ..... 01                               |  |
|                                                                                                                                                                                        |  | Pas a la maison ..... 02                       |  |
|                                                                                                                                                                                        |  | Refusé ..... 03                                |  |
|                                                                                                                                                                                        |  | Rempli partiellement ..... 04                  |  |
|                                                                                                                                                                                        |  | Incapacité ..... 05                            |  |
|                                                                                                                                                                                        |  | Autres (Précisez): ..... 06                    |  |
| Notes de l'enquêteur (trice)                                                                                                                                                           |  |                                                |  |
|                                                                                                                                                                                        |  |                                                |  |
| WM9 Contrôleur (Nom et Numéro): .....                                                                                                                                                  |  |                                                |  |
| WM10. Enregistrez l'heure.                                                                                                                                                             |  | Heures et minutes: ____ : ____                 |  |
|                                                                                                                                                                                        |  |                                                |  |

| ANTECEDENTS FEMMES                                                                                                                                         |                                                                                                                                                                          | WB    |
|------------------------------------------------------------------------------------------------------------------------------------------------------------|--------------------------------------------------------------------------------------------------------------------------------------------------------------------------|-------|
| WB1. EN QUEL MOIS ET EN QUELLE ANNEE ETES-VOUS NEE?<br><br><i>Inserez '98 (pour mois), apres avoir insister pour avoir le mois de naissance</i>            | Date de naissance<br><br>Mois <input type="text"/> <input type="text"/><br><br>Annee <input type="text"/> <input type="text"/> <input type="text"/> <input type="text"/> |       |
| WB2. QUEL AGE AVEZ-VOUS?<br><i>Insistez: QUEL AGE AVIEZ-VOUS A VOTRE DERNIER ANNIVERSAIRE?</i><br><i>Comparez et corriger WB1 et/ou WB2 si incohérence</i> | Age (en annees completes) <input type="text"/> <input type="text"/>                                                                                                      |       |
| WB3.AVEZ-VOUS FREQUENTE L'ECOLE CLASSIQUE OU MEDERSA?                                                                                                      | Oui, école classique ..... 1<br><br>Oui, medersa ..... 2<br><br>Non ..... 3                                                                                              | → CM1 |
| WB4. QUEL EST LE PLUS HAUT NIVEAU D'ETUDES QUE VOUS AVEZ ATTEINT?                                                                                          | Primaire (1 à 6) ..... 1<br><br>Secondaire 1 (7 à 9) ..... 2<br><br>Secondaire 2 (10 à 12) ..... 3<br><br>Supérieur ..... 4                                              |       |
| WB5. QUELLE EST LA DERNIERE ANNEE / CLASSE QUE VOUS AVIEZ ACHEVE AVEC SUCCES A CE NIVEAU ?<br><br><i>Si moins d'une année, enregistrez "00"</i>            | Classe/Annee ..... <input type="text"/> <input type="text"/>                                                                                                             |       |

| MORTALITE INFANTILE                                                                                                                                                                                                                                                                                                                                                                |                                                                                                                                                                                                                    | CM      |  |  |  |  |  |  |  |  |
|------------------------------------------------------------------------------------------------------------------------------------------------------------------------------------------------------------------------------------------------------------------------------------------------------------------------------------------------------------------------------------|--------------------------------------------------------------------------------------------------------------------------------------------------------------------------------------------------------------------|---------|--|--|--|--|--|--|--|--|
| MAINTENANT, JE VOUDRAIS VOUS POSER DES QUESTIONS EN RAPPORT AVEC TOUTES LES GROSSESSES QUE VOUS AVEZ EU DANS VOTRE VIE. PAR CELA, JE VEUX PARLER DE TOUS LES ACCOUCHEMENTS QUE VOUS AVEZ EU, QUE CES DERNIERS SOIENT NES VIVANTS OU MORTS-NES, QU'ILS SOIENT ENCORE EN VIE OU PAS, ET AUSSI LES GROSSESSES QUE VOUS AVEZ EUES MAIS QUI NE SE SONT PAS ACHEVEES PAR DES NAISSANCES. |                                                                                                                                                                                                                    |         |  |  |  |  |  |  |  |  |
| CM1. AVEZ-VOUS DEJA DONNE NAISSANCE A DES ENFANTS ?                                                                                                                                                                                                                                                                                                                                | Oui ..... 1<br>Non ..... 2                                                                                                                                                                                         | 2 → CM8 |  |  |  |  |  |  |  |  |
| CM2. AVEZ-VOUS DES FILS OU DES FILLES A QUI VOUS AVEZ DONNE NAISSANCE ET QUI VIVENT ACTUELLEMENT AVEC VOUS ?                                                                                                                                                                                                                                                                       | Oui ..... 1<br>Non ..... 2                                                                                                                                                                                         | 2 → CM4 |  |  |  |  |  |  |  |  |
| CM3. COMBIEN DE FILS VIVENT AVEC VOUS ?<br>ET COMBIEN DE FILLES VIVENT AVEC VOUS ?                                                                                                                                                                                                                                                                                                 | Fils à la maison..... <table border="1"><tr><td></td><td></td></tr><tr><td></td><td></td></tr></table><br>Filles à la maison..... <table border="1"><tr><td></td><td></td></tr><tr><td></td><td></td></tr></table> |         |  |  |  |  |  |  |  |  |
|                                                                                                                                                                                                                                                                                                                                                                                    |                                                                                                                                                                                                                    |         |  |  |  |  |  |  |  |  |
|                                                                                                                                                                                                                                                                                                                                                                                    |                                                                                                                                                                                                                    |         |  |  |  |  |  |  |  |  |
|                                                                                                                                                                                                                                                                                                                                                                                    |                                                                                                                                                                                                                    |         |  |  |  |  |  |  |  |  |
|                                                                                                                                                                                                                                                                                                                                                                                    |                                                                                                                                                                                                                    |         |  |  |  |  |  |  |  |  |
| <i>Si aucun, inscrivez '00'</i>                                                                                                                                                                                                                                                                                                                                                    |                                                                                                                                                                                                                    |         |  |  |  |  |  |  |  |  |
| CM4. AVEZ-VOUS DES FILS OU FILLES A QUI VOUS AVEZ DONNE NAISSANCE QUI SONT TOUJOURS EN VIE MAIS QUI NE VIVENT PAS AVEC VOUS ?                                                                                                                                                                                                                                                      | Oui ..... 1<br>Non ..... 2                                                                                                                                                                                         | 2 → CM6 |  |  |  |  |  |  |  |  |
| CM5. COMBIEN DE FILS SONT VIVANTS MAIS QUI NE VIVENT PAS AVEC VOUS ?<br>COMBIEN DE FILLES SONT VIVANTES MAIS QUI NE VIVENT PAS AVEC VOUS ?                                                                                                                                                                                                                                         | Fils ailleurs ..... <table border="1"><tr><td></td><td></td></tr><tr><td></td><td></td></tr></table><br>Filles ailleurs ..... <table border="1"><tr><td></td><td></td></tr><tr><td></td><td></td></tr></table>     |         |  |  |  |  |  |  |  |  |
|                                                                                                                                                                                                                                                                                                                                                                                    |                                                                                                                                                                                                                    |         |  |  |  |  |  |  |  |  |
|                                                                                                                                                                                                                                                                                                                                                                                    |                                                                                                                                                                                                                    |         |  |  |  |  |  |  |  |  |
|                                                                                                                                                                                                                                                                                                                                                                                    |                                                                                                                                                                                                                    |         |  |  |  |  |  |  |  |  |
|                                                                                                                                                                                                                                                                                                                                                                                    |                                                                                                                                                                                                                    |         |  |  |  |  |  |  |  |  |
| <i>Si aucun, inscrivez '00'</i>                                                                                                                                                                                                                                                                                                                                                    |                                                                                                                                                                                                                    |         |  |  |  |  |  |  |  |  |
| CM6. AVEZ-VOUS DEJA DONNE NAISSANCE A UN GARÇON OU A UNE FILLE QUI EST NE VIVANT MAIS QUI EST DECEDE PAR LA SUITE ?                                                                                                                                                                                                                                                                | Oui ..... 1<br>Non ..... 2                                                                                                                                                                                         | 2 → CM8 |  |  |  |  |  |  |  |  |
| <i>Si aucun, vérifiez en disant:</i><br>JE VOUDRAIS DIRE, AUCUN BEBE QUI A RESPIRE, CRIE OU MONTRE UN SIGNE DE VIE - MEME S'IL N'A SURVECU QUE QUELQUES MINUTES?                                                                                                                                                                                                                   |                                                                                                                                                                                                                    |         |  |  |  |  |  |  |  |  |
| CM7. COMBIEN DE GARÇONS SONT DÉCÉDÉS ?<br>COMBIEN DE FILLES SONT DECEDES ?                                                                                                                                                                                                                                                                                                         | Garçons décédés ..... <table border="1"><tr><td></td><td></td></tr><tr><td></td><td></td></tr></table><br>Filles décédées ..... <table border="1"><tr><td></td><td></td></tr><tr><td></td><td></td></tr></table>   |         |  |  |  |  |  |  |  |  |
|                                                                                                                                                                                                                                                                                                                                                                                    |                                                                                                                                                                                                                    |         |  |  |  |  |  |  |  |  |
|                                                                                                                                                                                                                                                                                                                                                                                    |                                                                                                                                                                                                                    |         |  |  |  |  |  |  |  |  |
|                                                                                                                                                                                                                                                                                                                                                                                    |                                                                                                                                                                                                                    |         |  |  |  |  |  |  |  |  |
|                                                                                                                                                                                                                                                                                                                                                                                    |                                                                                                                                                                                                                    |         |  |  |  |  |  |  |  |  |
| <i>Si aucun, inscrivez '00'</i>                                                                                                                                                                                                                                                                                                                                                    |                                                                                                                                                                                                                    |         |  |  |  |  |  |  |  |  |
| CM8. DES GROSSESSES PEUVENT SE TERMINER PAR LA NAISSANCE D'UN BEBE QUI EST DEJA MORT, QU'ON APPELLE SOUVENT MORT-NE. AVEZ-VOUS DEJA ACCOUCHE D'UN MORT-NE?                                                                                                                                                                                                                         | Oui 1 → <i>Demandez</i><br>COMBIEN DE MORTS-NES? <table border="1"><tr><td></td><td></td></tr></table><br>Non 2                                                                                                    |         |  |  |  |  |  |  |  |  |
|                                                                                                                                                                                                                                                                                                                                                                                    |                                                                                                                                                                                                                    |         |  |  |  |  |  |  |  |  |
| CM9. QUELQUES FOIS, DES FEMMES PORTENT DES GROSSESSES QUI NE SE TERMINENT PAS PAR DES NAISSANCES VIVANTES ET S'ARRETENT BIEN AVANT LA FIN (LE TERME) DE LA GROSSESSE, PAR EXEMPLE LES FAUSSES-COUCHES OU LES AVORTEMENTS. EN DEHORS DES MORTS-NES, AVEZ-VOUS DEJA EU DES FAUSSES-COUCHES OU DES AVORTEMENTS?                                                                       | Oui 1 → <i>Demandez</i><br>AU TOTAL, COMBIEN DE FAUSSES-COUCHES ET AVORTEMENTS? <table border="1"><tr><td></td><td></td></tr></table><br>Non 2                                                                     |         |  |  |  |  |  |  |  |  |
|                                                                                                                                                                                                                                                                                                                                                                                    |                                                                                                                                                                                                                    |         |  |  |  |  |  |  |  |  |
| CM10. FAITES LA SOMME DES REPONSES À CM3, CM5 ET CM7                                                                                                                                                                                                                                                                                                                               | Somme (Naissances vivantes) <table border="1"><tr><td></td><td></td></tr></table>                                                                                                                                  |         |  |  |  |  |  |  |  |  |
|                                                                                                                                                                                                                                                                                                                                                                                    |                                                                                                                                                                                                                    |         |  |  |  |  |  |  |  |  |
| <i>Si aucun, inscrivez '00'</i>                                                                                                                                                                                                                                                                                                                                                    |                                                                                                                                                                                                                    |         |  |  |  |  |  |  |  |  |
| CM11. FAITES LA SOMME DES REPONSES À CM8 ET CM9                                                                                                                                                                                                                                                                                                                                    | Somme (Autres grossesses) <table border="1"><tr><td></td><td></td></tr></table>                                                                                                                                    |         |  |  |  |  |  |  |  |  |
|                                                                                                                                                                                                                                                                                                                                                                                    |                                                                                                                                                                                                                    |         |  |  |  |  |  |  |  |  |
| <i>Si aucun, inscrivez '00'</i>                                                                                                                                                                                                                                                                                                                                                    |                                                                                                                                                                                                                    |         |  |  |  |  |  |  |  |  |
| CM12. JE VOUDRAIS ETRE SUR QUE JE VOUS AI BIEN COMPRISE: VOUS AVIEZ EU AU TOTAL _____<br>(TOTAL A CM10) NAISSANCES VIVANTES DANS VOTRE VIE. EST-CE BIEN EXACT?<br><input type="checkbox"/> Oui <input type="checkbox"/> Non- Insistez et corrigez CM3 a CM7 et CM10 si necessaire                                                                                                  |                                                                                                                                                                                                                    |         |  |  |  |  |  |  |  |  |
| CM13. ET VOUS AVIEZ EU AU TOTAL _____ (TOTAL A CM11) MORT-NES, FAUSSES-COUCHES ET AVORTEMENTS<br>DANS VOTRE VIE. EST-CE BIEN EXACT?<br><input type="checkbox"/> Oui <input type="checkbox"/> Non- Insistez et corrigez CM8, CM9 et CM11 si necessaire                                                                                                                              |                                                                                                                                                                                                                    |         |  |  |  |  |  |  |  |  |
| CM14. VERIFIEZ TOTAL DE CM10 ET CM11<br><input type="checkbox"/> Une ou plusieurs grossesses → PH1 (Section suivant) <input type="checkbox"/> Pas de grossesse → PH18                                                                                                                                                                                                              |                                                                                                                                                                                                                    |         |  |  |  |  |  |  |  |  |

| HISTORIQUE DE GROSSESSE                                                                                                                                      |                                                                                                     |                                                                    |                                                         |                                  |                                                   |                                                                                                                                           | PH                                  |
|--------------------------------------------------------------------------------------------------------------------------------------------------------------|-----------------------------------------------------------------------------------------------------|--------------------------------------------------------------------|---------------------------------------------------------|----------------------------------|---------------------------------------------------|-------------------------------------------------------------------------------------------------------------------------------------------|-------------------------------------|
| MAINTENANT, JE VOUDRAIS ENREGISTRER TOUTES VOS GROSSESSES, QU'ELLES SE SOIENT TERMINEES PAR DES NAISSANCES VIVANTES, MORT-NES OU AVORTEMENT (FAUSSE-COUCHE). |                                                                                                     |                                                                    |                                                         |                                  |                                                   |                                                                                                                                           |                                     |
| COMMENCEZ S'IL VOUS PLAIT PAR LA PREMIERE GROSSESSE QUE VOUS AVIEZ EUE.                                                                                      |                                                                                                     |                                                                    |                                                         |                                  |                                                   |                                                                                                                                           |                                     |
| Enregistrez toutes les grossesses. Enregistrez les jumeaux et les triplets sur des lignes differentes                                                        |                                                                                                     |                                                                    |                                                         |                                  |                                                   |                                                                                                                                           |                                     |
| PH1                                                                                                                                                          | PH2                                                                                                 | PH3                                                                | PH4                                                     | PH5                              | PH6                                               | PH7                                                                                                                                       | PH8                                 |
| N0 de Ligne                                                                                                                                                  | VOTRE PREMIERE GROSSESSE/ GROSSESSE SUIVANTE ETAIT-ELLE UNE GROSSESSE SIMPLE OU MULTIPLE (JUMEAUX)? | LE BEBE EST-IL NE VIVANT, MORT-NE, OU FAUSSE COUCHE (AVORTEMENT) ? | CE BEBE A-T-IL CRIE, BOUGE OU RESPIRE LORSQU'IL EST NE? | QUEL ETAIT LE NOM DONNE AU BEBE? | (PRENOM) EST-IL/ELLE DE SEXE MASCULIN OU FEMININ? | EN QUEL MOIS ET EN QUELLE ANNEE (PRENOM) EST-IL NE? Inserez '98' (pour mois), seulement si, incapable apres insistance d'obtenir le mois. | (PRENOM) EST-IL/ELLE ENCORE EN VIE? |
| 01                                                                                                                                                           | Simple 1<br>Multiple 2                                                                              | Ne (e) vivant (e) 1<br>Mort-ne (e) 2<br>Fausse couche 3<br>→ PH13  | Oui 1<br>Non 2<br>→ PH13                                | _____<br>_____<br>(Nom)          | Garcon 1<br>Fille 2                               | Mois<br>Annee<br>_____<br>_____<br>→ PH12                                                                                                 | Oui 1<br>Non 2<br>→ PH12            |
| 02                                                                                                                                                           | Simple 1<br>Multiple 2                                                                              | Ne (e) vivant (e) 1<br>Mort-ne (e) 2<br>Fausse couche 3<br>→ PH13  | Oui 1<br>Non 2<br>→ PH13                                | _____<br>_____<br>(Nom)          | Garcon 1<br>Fille 2                               | Mois<br>Annee<br>_____<br>_____<br>→ PH12                                                                                                 | Oui 1<br>Non 2<br>→ PH12            |
| 03                                                                                                                                                           | Simple 1<br>Multiple 2                                                                              | Ne (e) vivant (e) 1<br>Mort-ne (e) 2<br>Fausse couche 3<br>→ PH13  | Oui 1<br>Non 2<br>→ PH13                                | _____<br>_____<br>(Nom)          | Garcon 1<br>Fille 2                               | Mois<br>Annee<br>_____<br>_____<br>→ PH12                                                                                                 | Oui 1<br>Non 2<br>→ PH12            |
| 04                                                                                                                                                           | Simple 1<br>Multiple 2                                                                              | Ne (e) vivant (e) 1<br>Mort-ne (e) 2<br>Fausse couche 3<br>→ PH13  | Oui 1<br>Non 2<br>→ PH13                                | _____<br>_____<br>(Nom)          | Garcon 1<br>Fille 2                               | Mois<br>Annee<br>_____<br>_____<br>→ PH12                                                                                                 | Oui 1<br>Non 2<br>→ PH12            |

| Si ne (e ) vivant (e ) et est encore en vie                                                       |                                                             |                                                                                                                                | Si ne (e ) vivant (e ) mais decede (e ) maintenant                                                                                                             |                                           | Si mort-ne (e ) ou fausse couche /avortement                                                                                                          |                                                                        |                                                                                                                                                     |                                                                                                                                                                    |
|---------------------------------------------------------------------------------------------------|-------------------------------------------------------------|--------------------------------------------------------------------------------------------------------------------------------|----------------------------------------------------------------------------------------------------------------------------------------------------------------|-------------------------------------------|-------------------------------------------------------------------------------------------------------------------------------------------------------|------------------------------------------------------------------------|-----------------------------------------------------------------------------------------------------------------------------------------------------|--------------------------------------------------------------------------------------------------------------------------------------------------------------------|
| PH9                                                                                               | PH10                                                        | PH11                                                                                                                           | PH12                                                                                                                                                           |                                           | PH13                                                                                                                                                  | PH14                                                                   | PH15                                                                                                                                                | PH16                                                                                                                                                               |
| QUEL AGE AVAIT (PRENOM) A SON DERNIER ANNIVERSAIRE?<br><i>Enregistrez age en annees completes</i> | (PRENOM) VIT-IL/ELLE AVEC VOUS?                             | Enregistrez le numero de ligne Menage de l'enfant (enregistrez '00' si enfant n'est pas sur la fiche denombrement des menages) | QUEL AGE AVAIT-IL/ELLE AU DECES? Si '1an' insistez: COMBIEN DE MOIS AVAIT (PRENOM)? Enregistrez jours si moins de 1 mois, et mois si moins de 2 ans, en annees |                                           | EN QUEL MOIS ET EN QUELLE ANNEE LA GROSSESE S'EST-ELLE ARRETEE? Inserez '98' (pour mois), seulement si, incapable apres insistance d'obtenir le mois. | COMBIEN DE MOIS LA GROSSESE A-T-ELLE DURE? Enregistrez en mois complet | AVIEZ-VOUS PAR VOUS- MEME ARRETER CETTE GROSSESE OU AVEC L'APPUI DE QUELQU'UN D'AUTRE ? Posez cette question seulement si PH3 a le code '3' entoure | Y-AVAIL-IL D'AUTRES GROSSESSES ENTRE CELLE-CI ET LA GROSSESE ANTERIEURE?( ETES VOUS SUR DE N'AVOIR PAS OUBLIER UNE GROSSESE ENTRE CELLES ANTERIEURES ET CELLE-CI?) |
| 01<br>Age en annees<br><input type="text"/> <input type="text"/>                                  | Oui 1<br>Non 2<br><input type="text"/> <input type="text"/> | N0 Ligne<br><input type="text"/> <input type="text"/>                                                                          | J 1<br>M 2<br>A 3<br><input type="text"/> <input type="text"/>                                                                                                 | <input type="text"/> <input type="text"/> | Mois <input type="text"/> <input type="text"/><br>Annee <input type="text"/> <input type="text"/>                                                     | Mois <input type="text"/> <input type="text"/>                         | Oui 1<br>Non 2                                                                                                                                      | Oui 1<br>Non 2                                                                                                                                                     |
| 02<br>Age en annees<br><input type="text"/> <input type="text"/>                                  | Oui 1<br>Non 2<br><input type="text"/> <input type="text"/> | N0 Ligne<br><input type="text"/> <input type="text"/>                                                                          | J 1<br>M 2<br>A 3<br><input type="text"/> <input type="text"/>                                                                                                 | <input type="text"/> <input type="text"/> | Mois <input type="text"/> <input type="text"/><br>Annee <input type="text"/> <input type="text"/>                                                     | Mois <input type="text"/> <input type="text"/>                         | Oui 1<br>Non 2                                                                                                                                      | Oui 1<br>Non 2                                                                                                                                                     |
| 03<br>Age en annees<br><input type="text"/> <input type="text"/>                                  | Oui 1<br>Non 2<br><input type="text"/> <input type="text"/> | N0 Ligne<br><input type="text"/> <input type="text"/>                                                                          | J 1<br>M 2<br>A 3<br><input type="text"/> <input type="text"/>                                                                                                 | <input type="text"/> <input type="text"/> | Mois <input type="text"/> <input type="text"/><br>Annee <input type="text"/> <input type="text"/>                                                     | Mois <input type="text"/> <input type="text"/>                         | Oui 1<br>Non 2                                                                                                                                      | Oui 1<br>Non 2                                                                                                                                                     |
| 04<br>Age en annees<br><input type="text"/> <input type="text"/>                                  | Oui 1<br>Non 2<br><input type="text"/> <input type="text"/> | N0 Ligne<br><input type="text"/> <input type="text"/>                                                                          | J 1<br>M 2<br>A 3<br><input type="text"/> <input type="text"/>                                                                                                 | <input type="text"/> <input type="text"/> | Mois <input type="text"/> <input type="text"/><br>Annee <input type="text"/> <input type="text"/>                                                     | Mois <input type="text"/> <input type="text"/>                         | Oui 1<br>Non 2                                                                                                                                      | Oui 1<br>Non 2                                                                                                                                                     |
| 05<br>Age en annees<br><input type="text"/> <input type="text"/>                                  | Oui 1<br>Non 2<br><input type="text"/> <input type="text"/> | N0 Ligne<br><input type="text"/> <input type="text"/>                                                                          | J 1<br>M 2<br>A 3<br><input type="text"/> <input type="text"/>                                                                                                 | <input type="text"/> <input type="text"/> | Mois <input type="text"/> <input type="text"/><br>Annee <input type="text"/> <input type="text"/>                                                     | Mois <input type="text"/> <input type="text"/>                         | Oui 1<br>Non 2                                                                                                                                      | Oui 1<br>Non 2                                                                                                                                                     |
| 06<br>Age en annees<br><input type="text"/> <input type="text"/>                                  | Oui 1<br>Non 2<br><input type="text"/> <input type="text"/> | N0 Ligne<br><input type="text"/> <input type="text"/>                                                                          | J 1<br>M 2<br>A 3<br><input type="text"/> <input type="text"/>                                                                                                 | <input type="text"/> <input type="text"/> | Mois <input type="text"/> <input type="text"/><br>Annee <input type="text"/> <input type="text"/>                                                     | Mois <input type="text"/> <input type="text"/>                         | Oui 1<br>Non 2                                                                                                                                      | Oui 1<br>Non 2                                                                                                                                                     |
| 07<br>Age en annees                                                                               | Oui 1                                                       | N0 Ligne                                                                                                                       | J 1<br>M 2                                                                                                                                                     | <input type="text"/> <input type="text"/> | Mois <input type="text"/> <input type="text"/><br>Annee <input type="text"/> <input type="text"/>                                                     | Mois                                                                   | Oui 1                                                                                                                                               | Oui 1                                                                                                                                                              |

|                                                                                                                                                                                                                                                                                                                                                           |  |                                        |                 |                      |
|-----------------------------------------------------------------------------------------------------------------------------------------------------------------------------------------------------------------------------------------------------------------------------------------------------------------------------------------------------------|--|----------------------------------------|-----------------|----------------------|
| <div><div></div><div></div></div> Non <div>2</div> <div><div></div><div></div></div> A <div>3</div> <div><div></div><div></div></div> <div><div></div><div></div><div></div><div></div></div> <div><div></div><div></div></div> Non <div>2</div> Non <div>2</div>                                                                                         |  |                                        |                 |                      |
| PH17. AVIEZ-VOUS EU UNE AUTRE GROSSESSE APRES LA DERNIERE QUE VOUS VENEZ DE MENTIONNER?                                                                                                                                                                                                                                                                   |  | Oui<br>Non                             | 1 →<br>2        | PH1                  |
| Exclure grossesse actuelle                                                                                                                                                                                                                                                                                                                                |  |                                        |                 |                      |
| PH18. ETES-VOUS ENCEINTE PRESENTEMENT                                                                                                                                                                                                                                                                                                                     |  | Oui<br>Non<br>NSP                      | 1<br>2 →<br>8 → | PH20<br>PH20<br>PH20 |
| PH19. DE COMBIEN DE MOIS ETES-VOUS ENCEINTE?                                                                                                                                                                                                                                                                                                              |  | <div><div></div><div></div></div> Mois |                 |                      |
| PH20. Comptez le nombre de naissances vivantes en comptant les lignes avec code PH6 entoure pour garcon ou fille                                                                                                                                                                                                                                          |  |                                        |                 |                      |
| Entrez total → <div><div></div><div></div></div>                                                                                                                                                                                                                                                                                                          |  |                                        |                 |                      |
| Ce nombre que vous venez d'entrer est-il le meme que celui de CM10?                                                                                                                                                                                                                                                                                       |  |                                        |                 |                      |
| <div><div></div></div> Oui <div><div></div></div> Non → Insistez et faites les corrections necessaires                                                                                                                                                                                                                                                    |  |                                        |                 |                      |
| PH21. Comptez le nombre des autres grossesses en comptant les lignes sans code PH6 entoure pour garcon ou fille                                                                                                                                                                                                                                           |  |                                        |                 |                      |
| Entrez total → <div><div></div><div></div></div>                                                                                                                                                                                                                                                                                                          |  |                                        |                 |                      |
| Ce nombre que vous venez d'entrer est-il le meme que celui de CM11?                                                                                                                                                                                                                                                                                       |  |                                        |                 |                      |
| <div><div></div></div> Oui <div><div></div></div> Non → Insistez et faites les corrections necessaires                                                                                                                                                                                                                                                    |  |                                        |                 |                      |
| PH22. Revisez les items suivants dans la section Historique de Grossesses et cocher chaque case après verification                                                                                                                                                                                                                                        |  |                                        |                 |                      |
| <div>* Pour chaque grossesse, l'annee est enregistree dans PH7 ou PH13</div> <div>* Pour chaque enfant vivant: l'age actuel est enregistre dans PH9</div> <div>* Pour chaque enfant decede: l'age au deces est enregistre dans PH12</div> <div>* Pour chaque enfant decede à l' age de 1 an ( 12 mois), insistez pour avoir le nombre exact de mois</div> |  |                                        |                 |                      |
| <div><div></div><div></div><div></div><div></div></div>                                                                                                                                                                                                                                                                                                   |  |                                        |                 |                      |

| HISTORIQUE DE GROSSESSE (CONTINUED)                                                                   |                                                                                                       |                                                                                     |                                                         |                                  |                                                    |                                                                                                                                           | PH                                  |
|-------------------------------------------------------------------------------------------------------|-------------------------------------------------------------------------------------------------------|-------------------------------------------------------------------------------------|---------------------------------------------------------|----------------------------------|----------------------------------------------------|-------------------------------------------------------------------------------------------------------------------------------------------|-------------------------------------|
| Ceci est la suite apres la Ligne 07 de la page precedente                                             |                                                                                                       |                                                                                     |                                                         |                                  |                                                    |                                                                                                                                           |                                     |
| Enregistrez toutes les grossesses. Enregistrez les jumeaux et les triplets sur des lignes differentes |                                                                                                       |                                                                                     |                                                         |                                  |                                                    |                                                                                                                                           |                                     |
| PH1                                                                                                   | PH2                                                                                                   | PH3                                                                                 | PH4                                                     | PH5                              | PH6                                                | PH7                                                                                                                                       | PH8                                 |
| N0 de Ligne                                                                                           | VOTRE PREMIERE GROSSESSE/ GROSSESSE SUIVANTE ETAIT-ELLE UNE GROSSESSE SIMPLE OU MULTIPLE (JUMENTAUX)? | LE BEBE EST-IL NE VIVANT, MORT-NE, OU MORT AVANT LA FIN (LE TERME) DE LA GROSSESSE? | CE BEBE A-T-IL CRIE, BOUGE OU RESPIRE LORSQU'IL EST NE? | QUEL ETAIT LE NOM DONNE AU BEBE? | (PRENOM) EST-IL/ELLE DE SEXE MASCHULIN OU FEMININ? | EN QUEL MOIS ET EN QUELLE ANNEE (PRENOM) EST-IL NE? Inserez '98' (pour mois), seulement si, incapable apres insistance d'obtenir le mois. | (PRENOM) EST-IL/ELLE ENCORE EN VIE? |
| 08                                                                                                    | Simple 1<br>Multiple 2                                                                                | Ne ( e) vivant ( e) 1<br>Mort-ne ( e) 2<br>Mort avant terme 3<br>→ PH5<br>→ PH13    | Oui 1<br>Non 2<br>→ PH13                                | _____<br>_____<br>(Nom)          | Garcon 1<br>Fille 2                                | Mois <input type="text"/><br>Annee <input type="text"/><br><input type="text"/><br><input type="text"/>                                   | Oui 1<br>Non 2<br>→ PH12            |
| 09                                                                                                    | Simple 1<br>Multiple 2                                                                                | Ne ( e) vivant ( e) 1<br>Mort-ne ( e) 2<br>Mort avant terme 3<br>→ PH5<br>→ PH13    | Oui 1<br>Non 2<br>→ PH13                                | _____<br>_____<br>(Nom)          | Garcon 1<br>Fille 2                                | Mois <input type="text"/><br>Annee <input type="text"/><br><input type="text"/><br><input type="text"/>                                   | Oui 1<br>Non 2<br>→ PH12            |
| 10                                                                                                    | Simple 1<br>Multiple 2                                                                                | Ne ( e) vivant ( e) 1<br>Mort-ne ( e) 2<br>Mort avant terme 3<br>→ PH5<br>→ PH13    | Oui 1<br>Non 2<br>→ PH13                                | _____<br>_____<br>(Nom)          | Garcon 1<br>Fille 2                                | Mois <input type="text"/><br>Annee <input type="text"/><br><input type="text"/><br><input type="text"/>                                   | Oui 1<br>Non 2<br>→ PH12            |
| 11                                                                                                    | Simple 1<br>Multiple 2                                                                                | Ne ( e) vivant ( e) 1<br>Mort-ne ( e) 2<br>Mort avant terme 3<br>→ PH5<br>→ PH13    | Oui 1<br>Non 2<br>→ PH13                                | _____<br>_____<br>(Nom)          | Garcon 1<br>Fille 2                                | Mois <input type="text"/><br>Annee <input type="text"/><br><input type="text"/><br><input type="text"/>                                   | Oui 1<br>Non 2<br>→ PH12            |

| Si ne (e ) vivant (e ) et est encore en vie                                                         |                                                             |                                                                                                                                | Si ne (e ) vivant (e ) mais decede (e ) maintenant                                                                                                             |                                                                                                                                                       | Si mort-ne (e ) ou mort avant la naissance                             |                                                                                                                                                           |                                                                   |
|-----------------------------------------------------------------------------------------------------|-------------------------------------------------------------|--------------------------------------------------------------------------------------------------------------------------------|----------------------------------------------------------------------------------------------------------------------------------------------------------------|-------------------------------------------------------------------------------------------------------------------------------------------------------|------------------------------------------------------------------------|-----------------------------------------------------------------------------------------------------------------------------------------------------------|-------------------------------------------------------------------|
| PH9                                                                                                 | PH10                                                        | PH11                                                                                                                           | PH12                                                                                                                                                           | PH13                                                                                                                                                  | PH14                                                                   | PH15                                                                                                                                                      | PH16                                                              |
| QUEL AGE AVAIT (PRENOM) A SON DERNIER ANNIVERSAIRE?<br><i>Enregistrez l'age en annees completes</i> | (PRENOM) VIT-IL/ELLE AVEC VOUS?                             | Enregistrez le numero de ligne Menage de l'enfant (enregistrez '00' si enfant n'est pas sur la fiche denombrement des menages) | QUEL AGE AVAIT-IL/ELLE AU DECES? Si '1an' insistez: COMBIEN DE MOIS AVAIT (PRENOM)? Enregistrez jours si moins de 1 mois, et mois si moins de 2 ans, en annees | EN QUEL MOIS ET EN QUELLE ANNEE LA GROSSESE S'EST-ELLE ARRETEE? Inserez '98' (pour mois), seulement si, incapable apres insistance d'obtenir le mois. | COMBIEN DE MOIS LA GROSSESE A-T-ELLE DURE? Enregistrez en mois complet | AVIEZ-VOUS PAR VOUS- MEME OU QUELQU'UN A-T-IL FAIT QUELQUE CHOSE POUR ARRETER CETTE GROSSESE? Posez cette question seulement si PH3 a le code '3' entoure | Y-AVAIL-IL D'AUTRES GROSSES ENTRE CELLES ANTERIEURES ET CELLE-CI? |
| 08<br>Age en annees<br><input type="text"/> <input type="text"/>                                    | Oui 1<br>Non 2<br><input type="text"/> <input type="text"/> | N0 Ligne<br><input type="text"/> <input type="text"/>                                                                          | J 1 <input type="text"/> <input type="text"/><br>M 2 <input type="text"/> <input type="text"/><br>A 3 <input type="text"/> <input type="text"/>                | Mois <input type="text"/> <input type="text"/><br>Annee <input type="text"/> <input type="text"/> <input type="text"/> <input type="text"/>           | Mois <input type="text"/> <input type="text"/>                         | Oui 1<br>Non 2                                                                                                                                            | Oui 1<br>Non 1                                                    |
| 09<br>Age en annees<br><input type="text"/> <input type="text"/>                                    | Oui 1<br>Non 2<br><input type="text"/> <input type="text"/> | N0 Ligne<br><input type="text"/> <input type="text"/>                                                                          | J 1 <input type="text"/> <input type="text"/><br>M 2 <input type="text"/> <input type="text"/><br>A 3 <input type="text"/> <input type="text"/>                | Mois <input type="text"/> <input type="text"/><br>Annee <input type="text"/> <input type="text"/> <input type="text"/> <input type="text"/>           | Mois <input type="text"/> <input type="text"/>                         | Oui 1<br>Non 2                                                                                                                                            | Oui 1<br>Non 1                                                    |
| 10<br>Age en annees<br><input type="text"/> <input type="text"/>                                    | Oui 1<br>Non 2<br><input type="text"/> <input type="text"/> | N0 Ligne<br><input type="text"/> <input type="text"/>                                                                          | J 1 <input type="text"/> <input type="text"/><br>M 2 <input type="text"/> <input type="text"/><br>A 3 <input type="text"/> <input type="text"/>                | Mois <input type="text"/> <input type="text"/><br>Annee <input type="text"/> <input type="text"/> <input type="text"/> <input type="text"/>           | Mois <input type="text"/> <input type="text"/>                         | Oui 1<br>Non 2                                                                                                                                            | Oui 1<br>Non 1                                                    |
| 11<br>Age en annees<br><input type="text"/> <input type="text"/>                                    | Oui 1<br>Non 2<br><input type="text"/> <input type="text"/> | N0 Ligne<br><input type="text"/> <input type="text"/>                                                                          | J 1 <input type="text"/> <input type="text"/><br>M 2 <input type="text"/> <input type="text"/><br>A 3 <input type="text"/> <input type="text"/>                | Mois <input type="text"/> <input type="text"/><br>Annee <input type="text"/> <input type="text"/> <input type="text"/> <input type="text"/>           | Mois <input type="text"/> <input type="text"/>                         | Oui 1<br>Non 2                                                                                                                                            | Oui 1<br>Non 1                                                    |
| 12<br>Age en annees<br><input type="text"/> <input type="text"/>                                    | Oui 1<br>Non 2<br><input type="text"/> <input type="text"/> | N0 Ligne<br><input type="text"/> <input type="text"/>                                                                          | J 1 <input type="text"/> <input type="text"/><br>M 2 <input type="text"/> <input type="text"/><br>A 3 <input type="text"/> <input type="text"/>                | Mois <input type="text"/> <input type="text"/><br>Annee <input type="text"/> <input type="text"/> <input type="text"/> <input type="text"/>           | Mois <input type="text"/> <input type="text"/>                         | Oui 1<br>Non 2                                                                                                                                            | Oui 1<br>Non 1                                                    |
| 13<br>Age en annees<br><input type="text"/> <input type="text"/>                                    | Oui 1<br>Non 2<br><input type="text"/> <input type="text"/> | N0 Ligne<br><input type="text"/> <input type="text"/>                                                                          | J 1 <input type="text"/> <input type="text"/><br>M 2 <input type="text"/> <input type="text"/><br>A 3 <input type="text"/> <input type="text"/>                | Mois <input type="text"/> <input type="text"/><br>Annee <input type="text"/> <input type="text"/> <input type="text"/> <input type="text"/>           | Mois <input type="text"/> <input type="text"/>                         | Oui 1<br>Non 2                                                                                                                                            | Oui 1<br>Non 1                                                    |
| 14<br>Age en annees                                                                                 | Oui 1                                                       | N0 Ligne                                                                                                                       | J 1 <input type="text"/> <input type="text"/><br>M 2 <input type="text"/> <input type="text"/>                                                                 | Mois <input type="text"/> <input type="text"/><br>Annee <input type="text"/> <input type="text"/> <input type="text"/> <input type="text"/>           | Mois                                                                   | Oui 1                                                                                                                                                     | Oui 1                                                             |

|             |     |               |               |      |             |             |             |             |     |   |     |   |
|-------------|-----|---------------|---------------|------|-------------|-------------|-------------|-------------|-----|---|-----|---|
| <div></div> | Non | <div></div> 2 | <div></div> A | 3    | <div></div> | <div></div> | <div></div> | <div></div> | Non | 2 | Non | 1 |
|             | →   | PH16          | →             | PH16 | →           | PH16        |             |             |     |   |     |   |

OBSERVATIONS DE L'ENQUETEUR/ L'ENQUÊTRICE

OBSERVATION CONTROLEUR

OBSERVATION DU SUPERVISEUR
